# Supplementary figures and images for: Testing an optimality-based model of rooting zone water storage capacity in temperate forests
Source: Copernicus journal article supplement (doi:10.5194/hess-2017-723), 2017-12-19

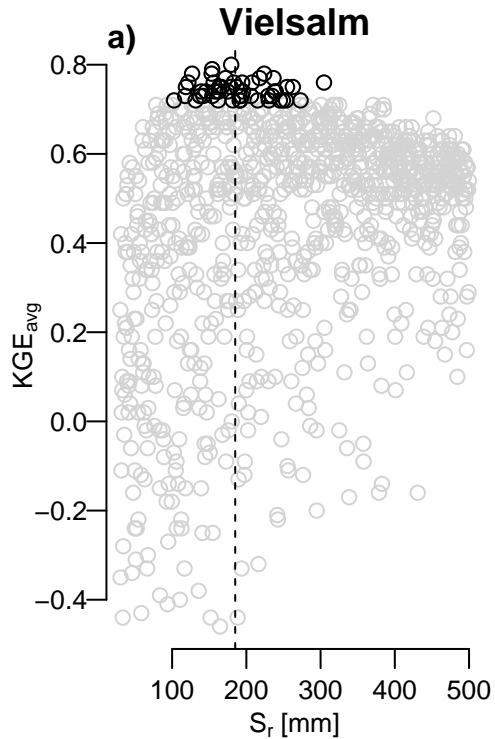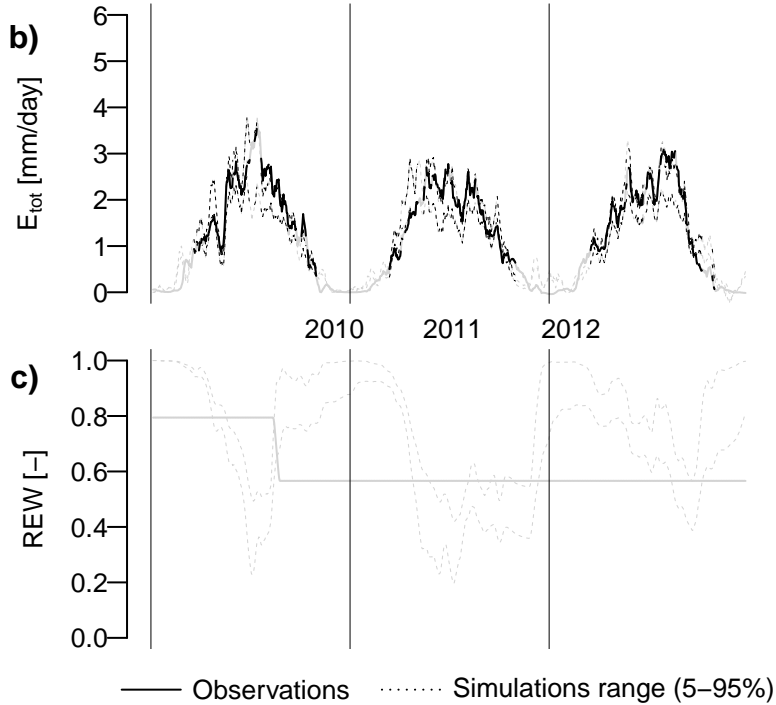

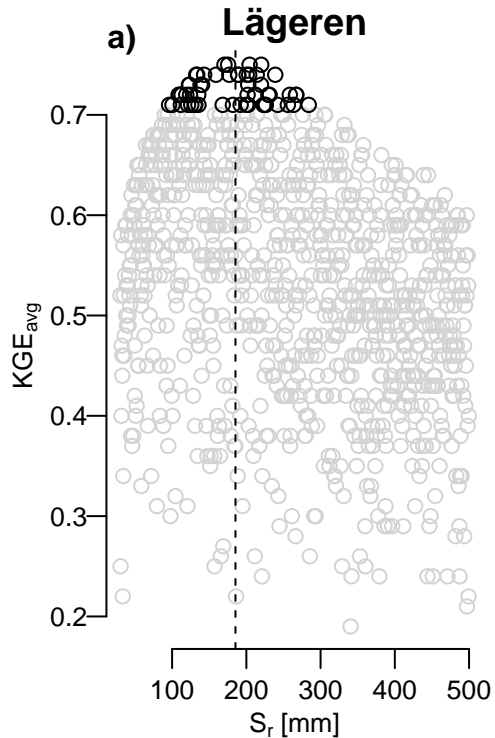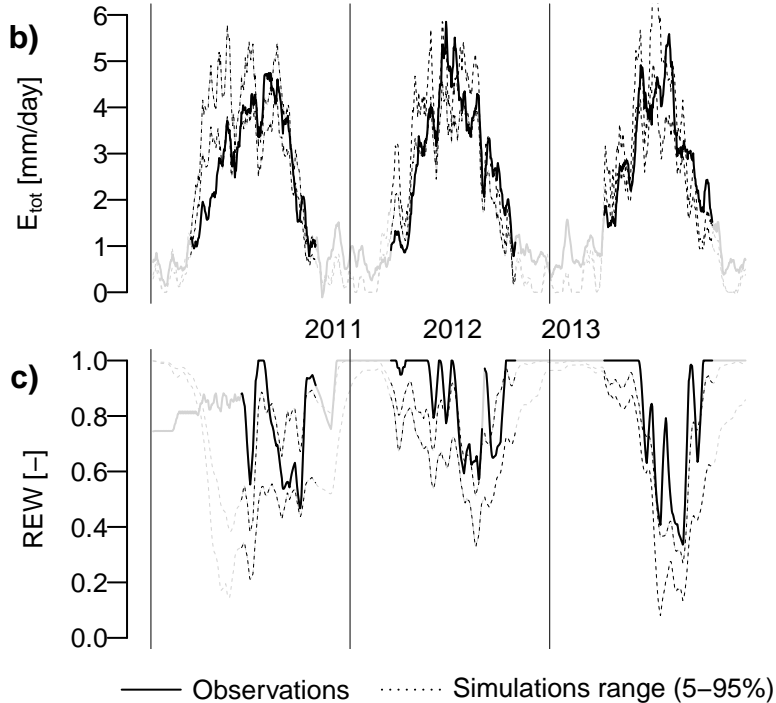

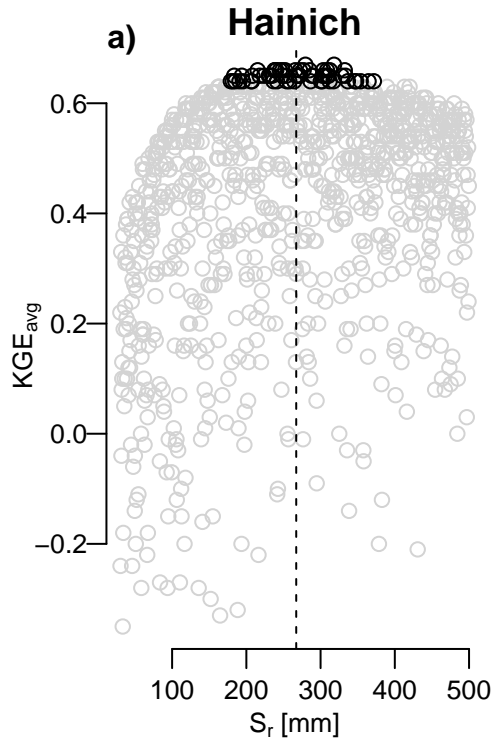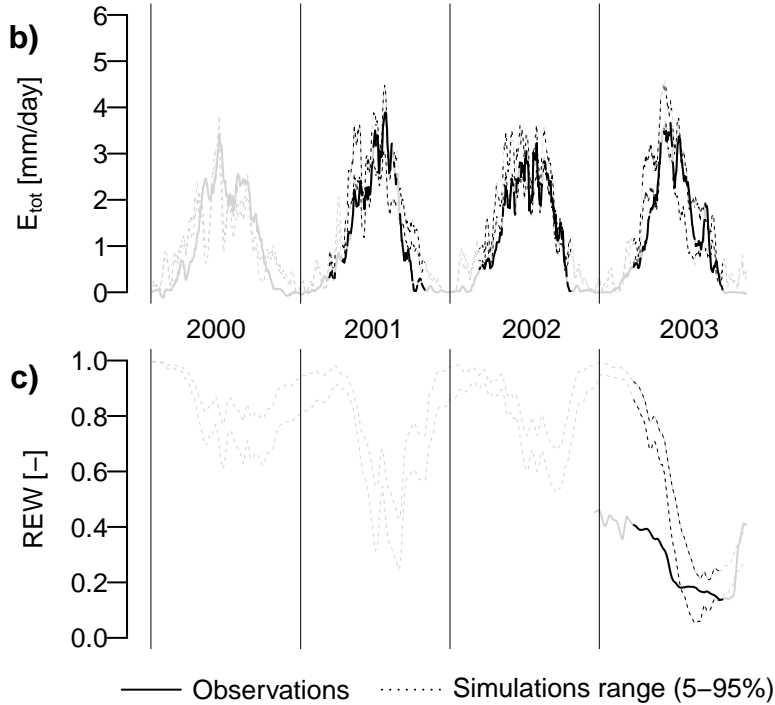

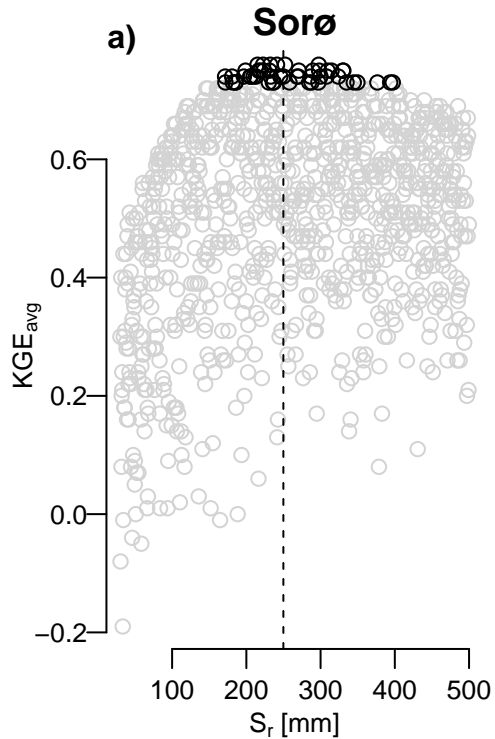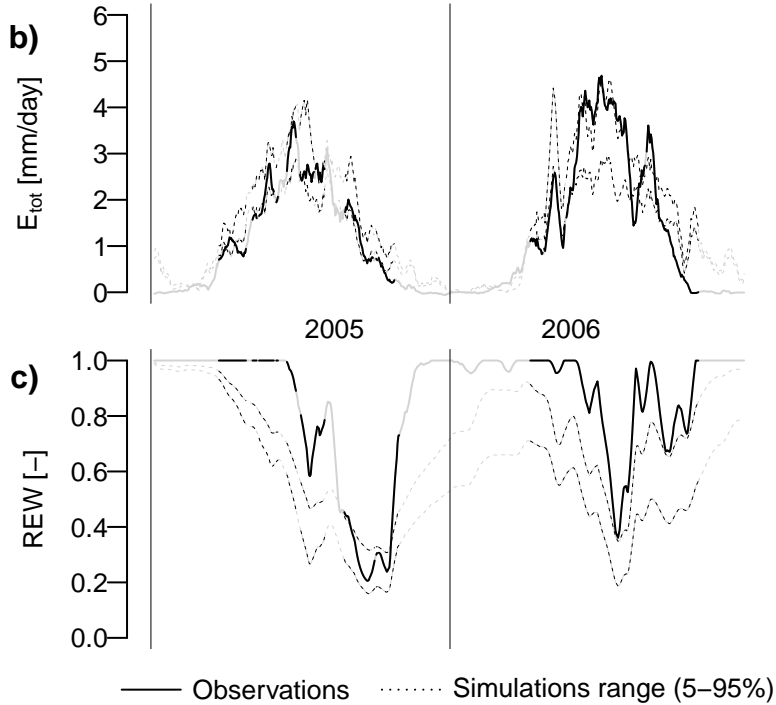

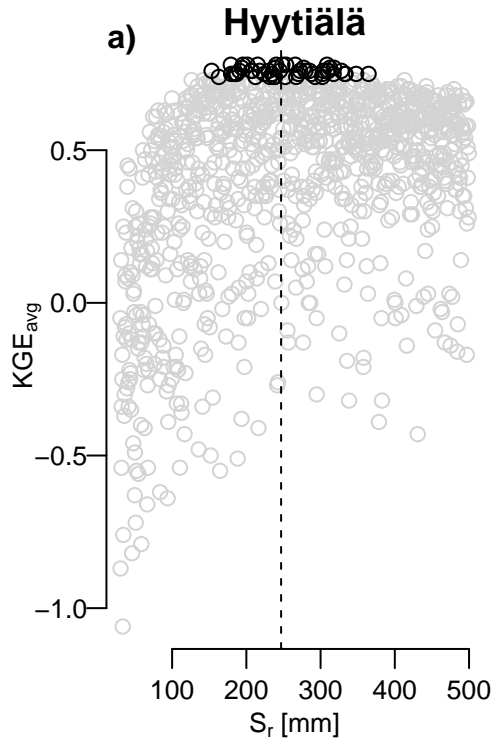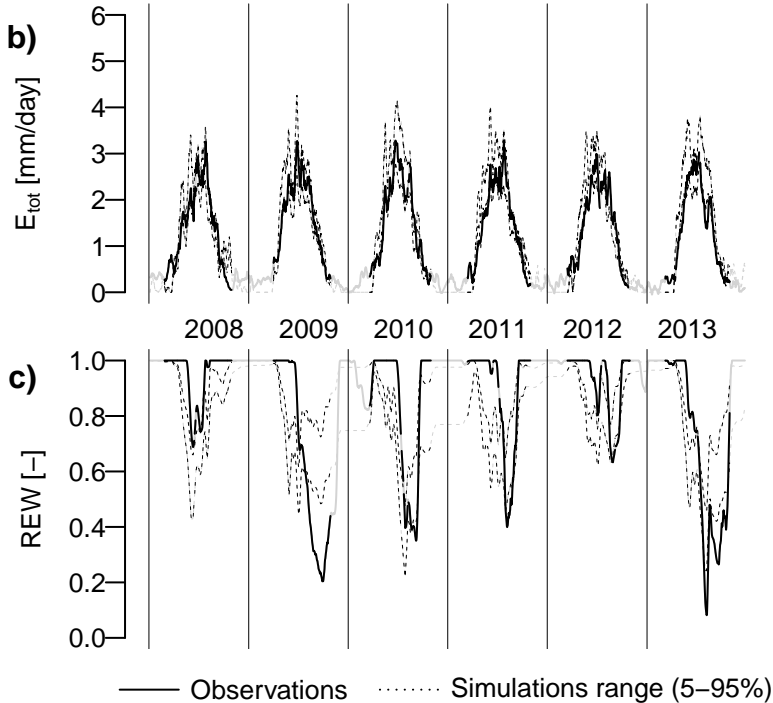

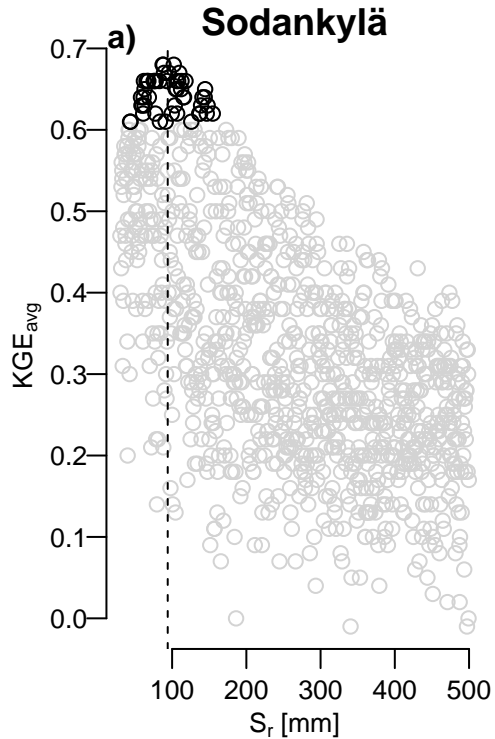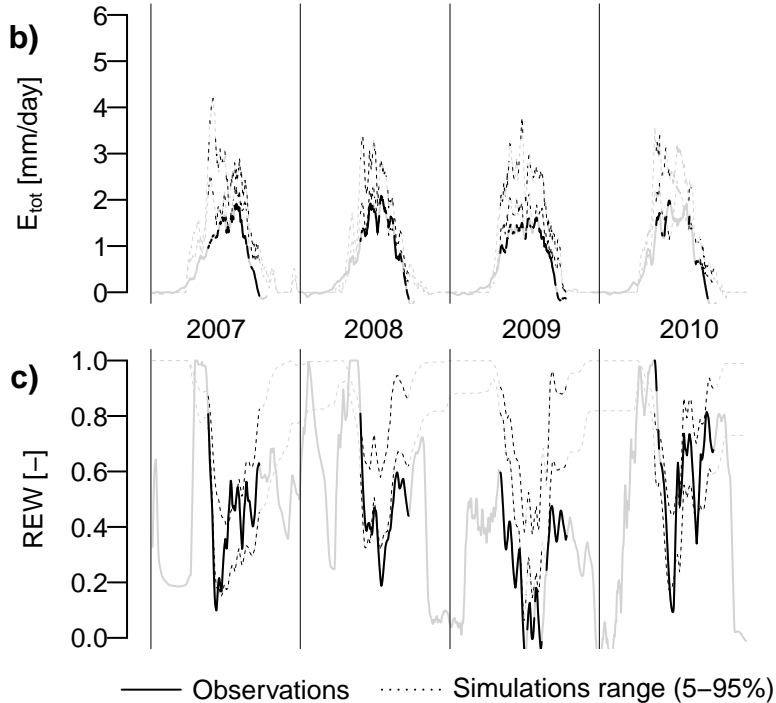

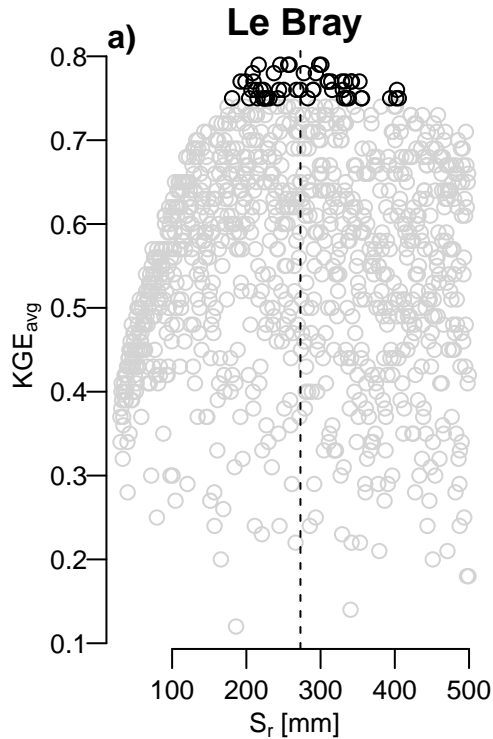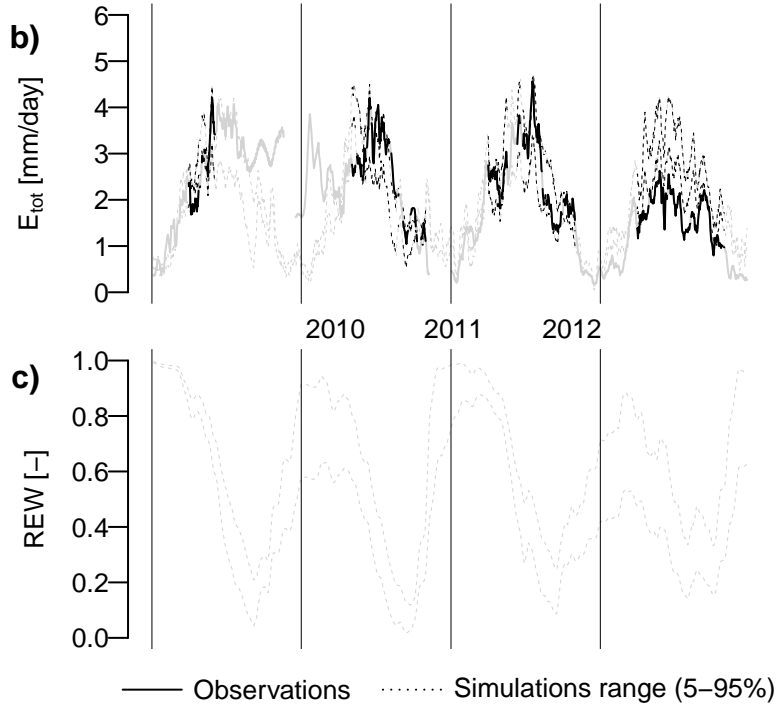

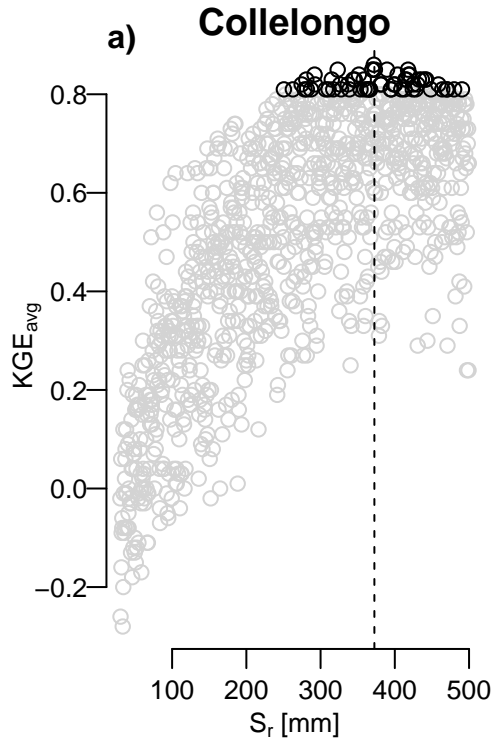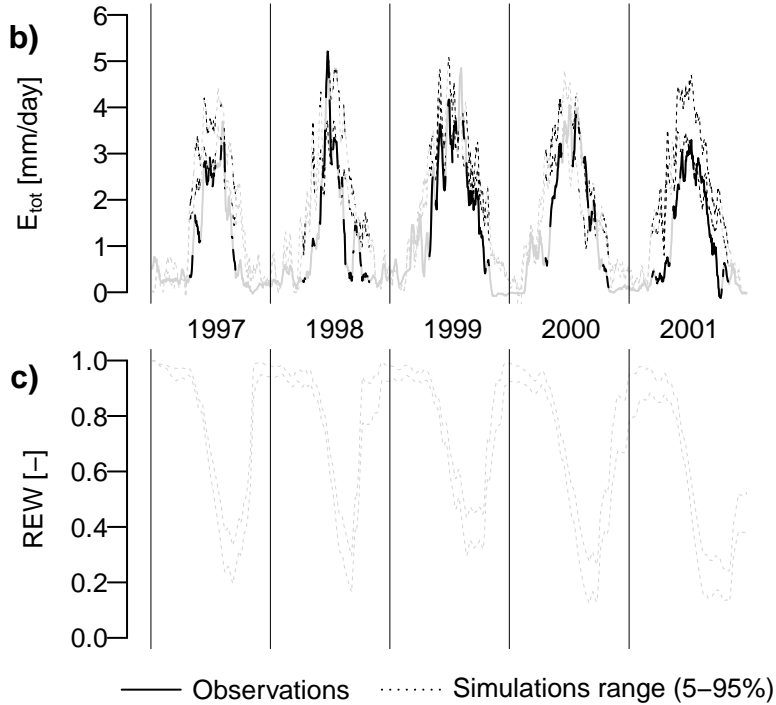



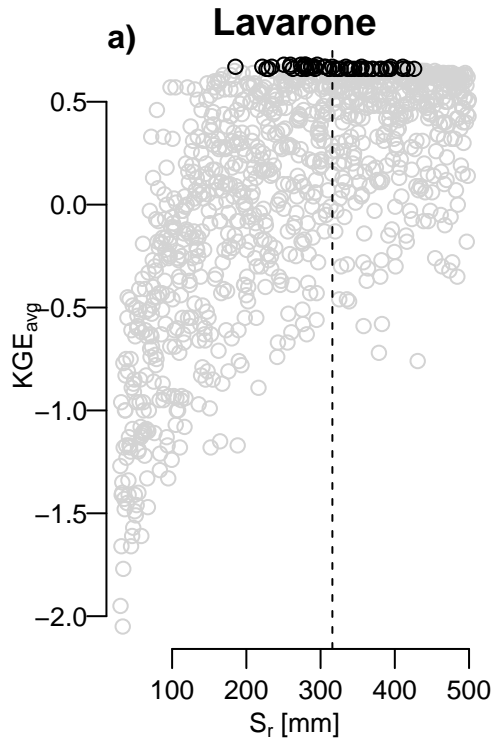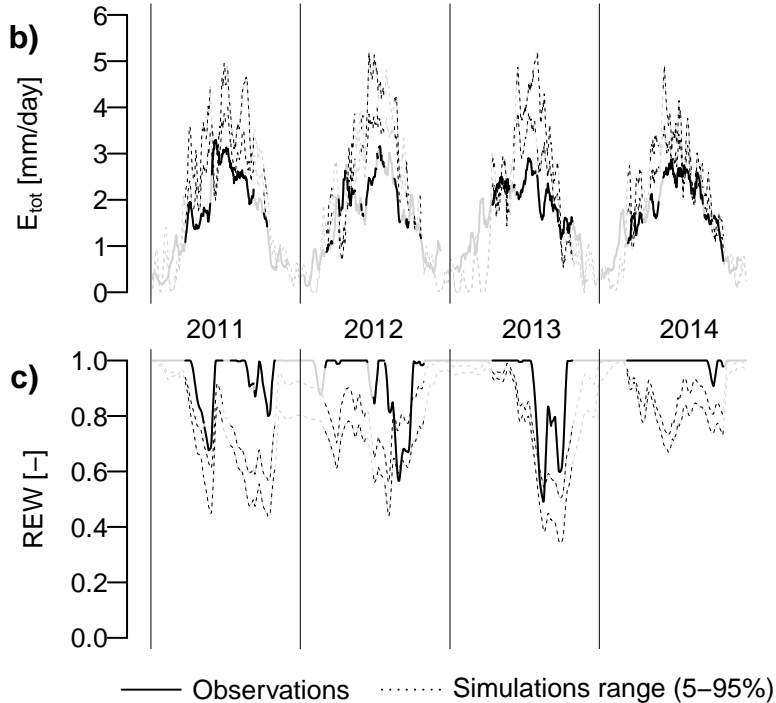

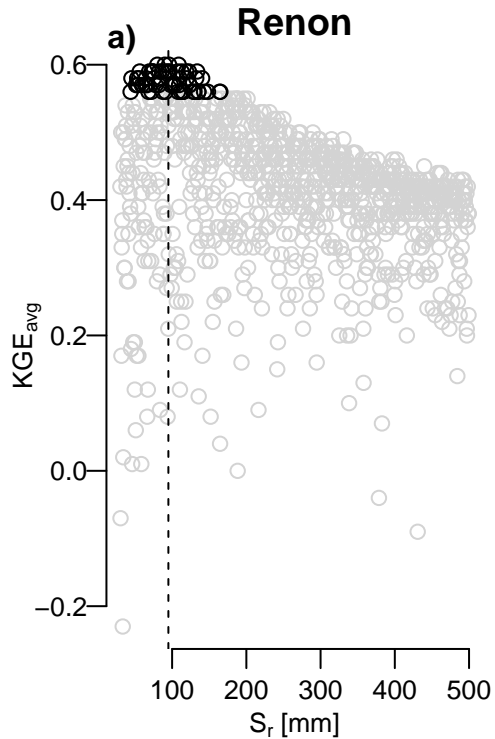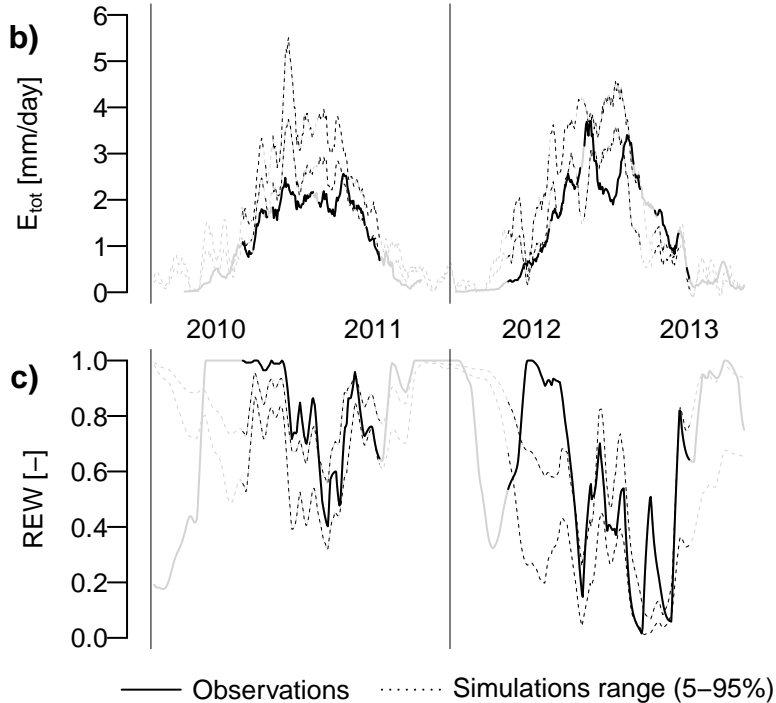

# a) Roccarespampani 2

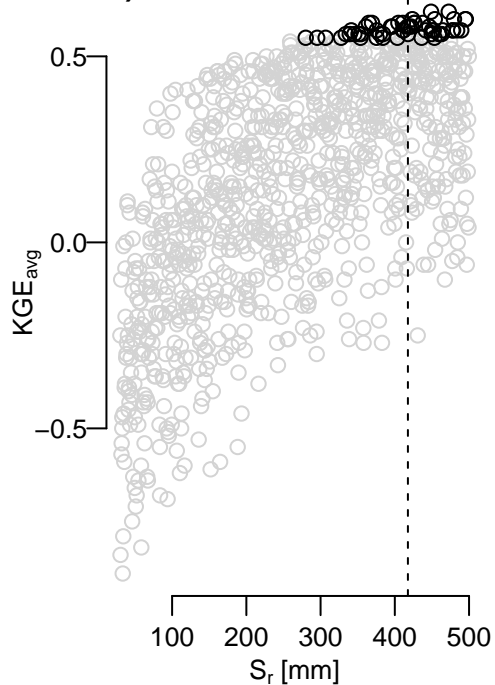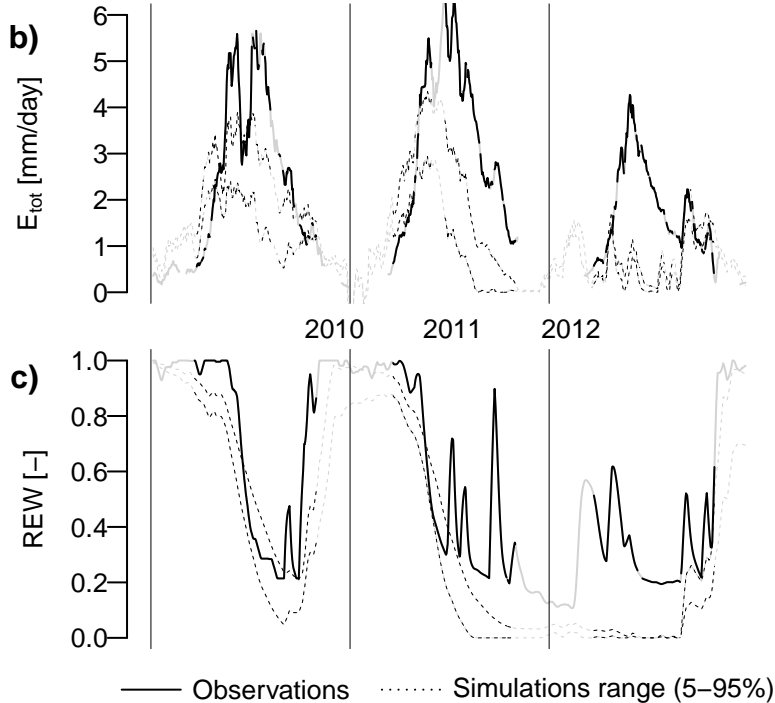

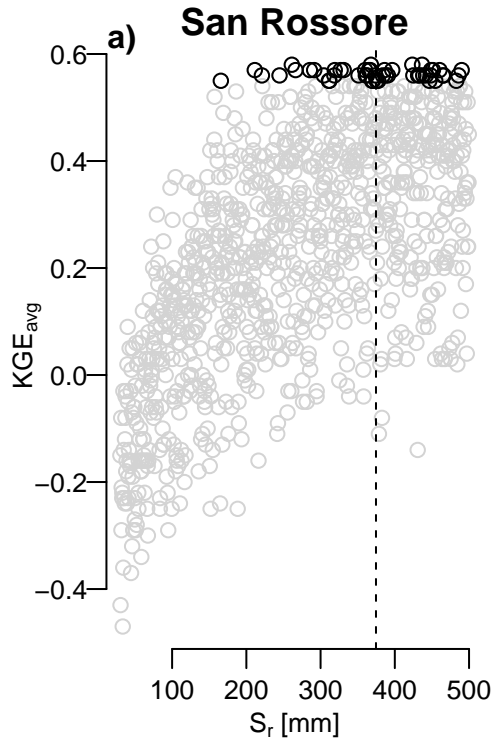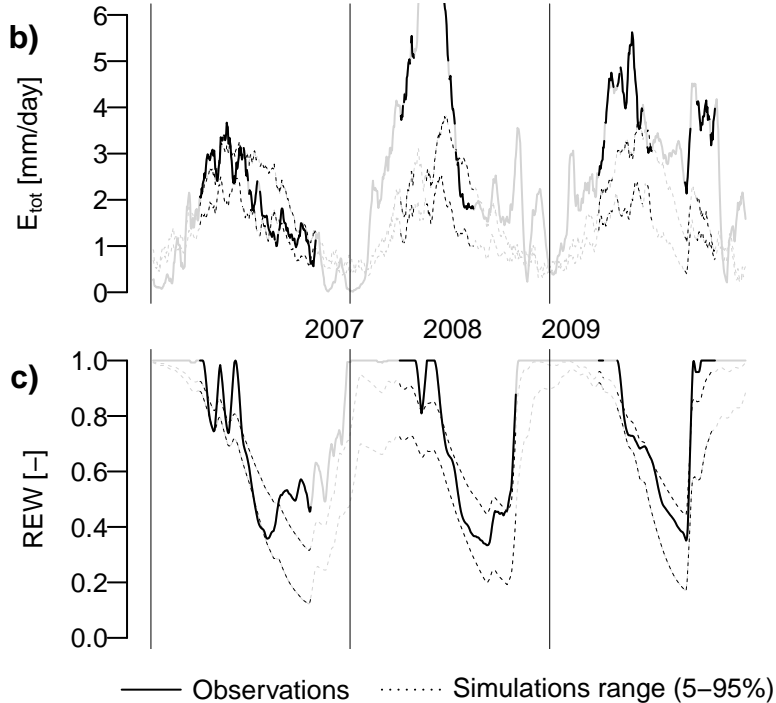

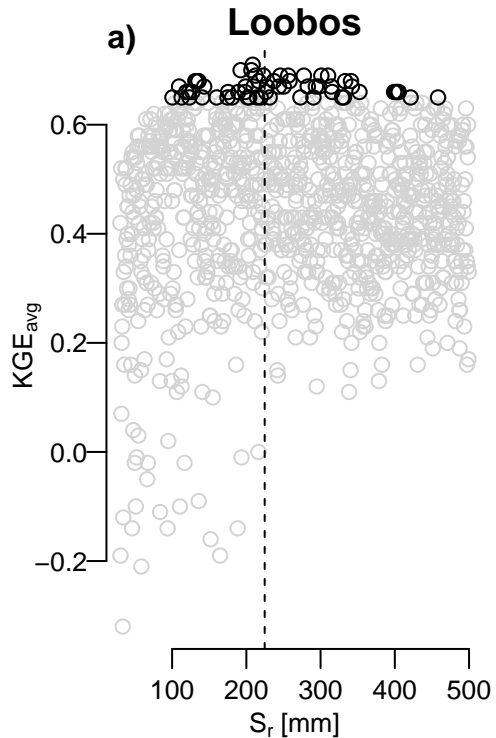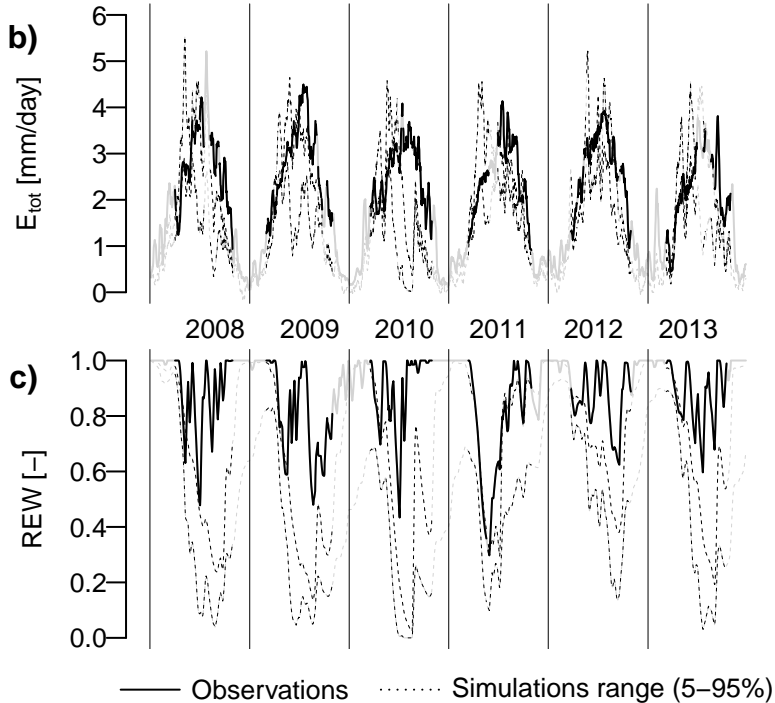

Supplement: Supplementary file 1 [file vali_suppl.pdf › vali_suppl.pdf]
